# Supplementary material for: Dual-functional two-dimensional covalent organic frameworks for water sensing and harvesting
Source: Royal Society of Chemistry journal article supplement (doi:10.1039/d1qm00231g), 2021-01-01
Supplement: d1qm00231g1.pdf [file d1qm00231g1.pdf]

## **Dual-Functional Two-Dimensional Covalent Organic Frameworks for Water Sensing and Harvesting**

Shan Jiang,<sup>a</sup> Lingchen Meng,<sup>a</sup> Wenyue Ma,<sup>a</sup> Guocui Pan,<sup>a</sup> Wei Zhang,<sup>c</sup> Yongcun Zou,<sup>b</sup> Leijing Liu<sup>\*a</sup>, Bin Xu,<sup>a</sup> Wenjing Tian<sup>\*a</sup>

<sup>a</sup> State Key Laboratory of Supramolecular Structure and Materials, College of Chemistry, Jilin University, Changchun 130012, China.

<sup>b</sup> State Key Laboratory of Inorganic Synthesis and Preparative Chemistry, College of Chemistry, Jilin University, Changchun 130012, China.

<sup>c</sup> Electron Microscopy Center, Jilin University, Changchun 130012, China

### **Contents**

1. Experimental Section
2. Supplementary Figures and Tables
3. Reference

## 1. Instruments and methods

The solid-state  $^{13}\text{C}$  cross-polarization/magic-angle spinning (CP/MAS) NMR spectra were obtained using a Bruker AVANCE III 400 WB spectrometer. Powder X-ray diffraction data were recorded by a Rigaku 2550 diffractometer with  $\text{Cu}\cdot\text{K}\alpha$  radiation ( $\lambda = 1.5418 \text{ \AA}$ ) at 298K (scan range: 2-40°). Fourier transform infrared (FTIR) spectra were recorded on a Vertex 80V spectrometer (Germany). TGA was carried out using a TA Q500 thermogravimeter from room temperature to 800 °C under an air atmosphere at the heating rate of 10 °C  $\text{min}^{-1}$  under a nitrogen atmosphere. Elemental analyses were performed using a Vario Micro (Elementar) spectrometer. Scanning electron microscope (SEM) images were recorded on scanning electron microscopy, JEOL JSM 6700F (Japan). Transmission electron microscope (TEM) images were recorded on a JEM-2100F instrument with an accelerating voltage of 200 kV. The sample was prepared by placing a drop of the stock solution on a 300-mesh, carbon coated copper grid and air-dried before measurement. UV-Vis spectra were recorded with a Shimadzu UV-2550 spectrophotometer (Japan). Fluorescence spectroscopy was taken with a Shimadzu RF-5301 PC spectrometer. The gas adsorption–desorption measurements at different temperatures were carried out using the Micromeritics ASAP 2020 instrument. The samples were degassed at 120 °C under vacuum for 10 h. Water adsorption was carried out by using IGAcorp dynamic moisture sorption analyzer (DVS) of Hiden company.

## 2. Supplementary Figures and Tables

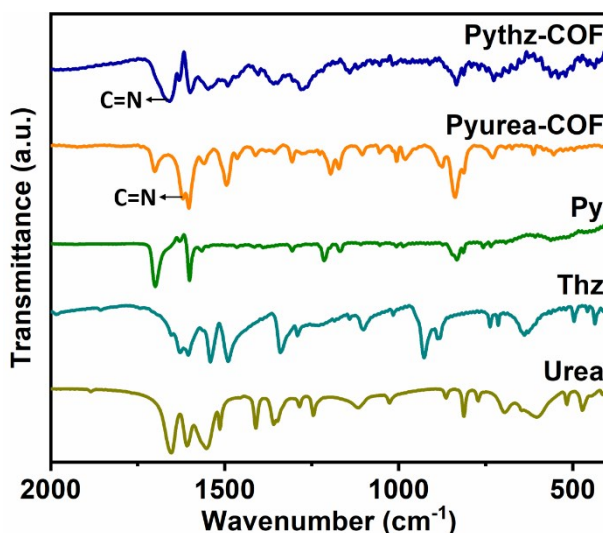

**Figure S1.** FTIR spectra of Py, Thz, Urea, Pythz-COF and Pyurea-COF.

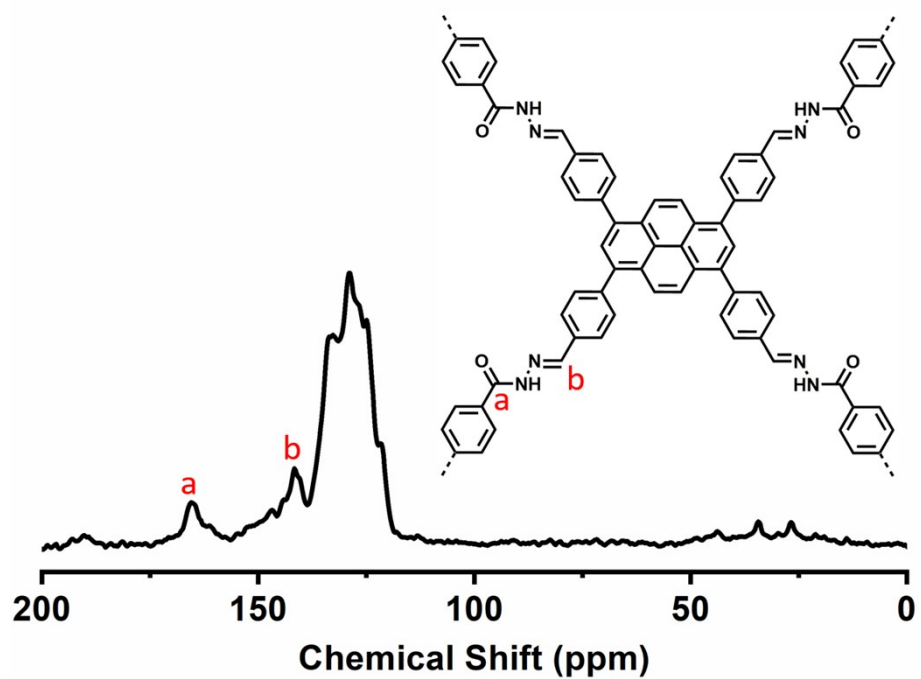

**Figure S2.** Solid-state  $^{13}\text{C}$  CP/MAS NMR spectrum of Pythz-COF.

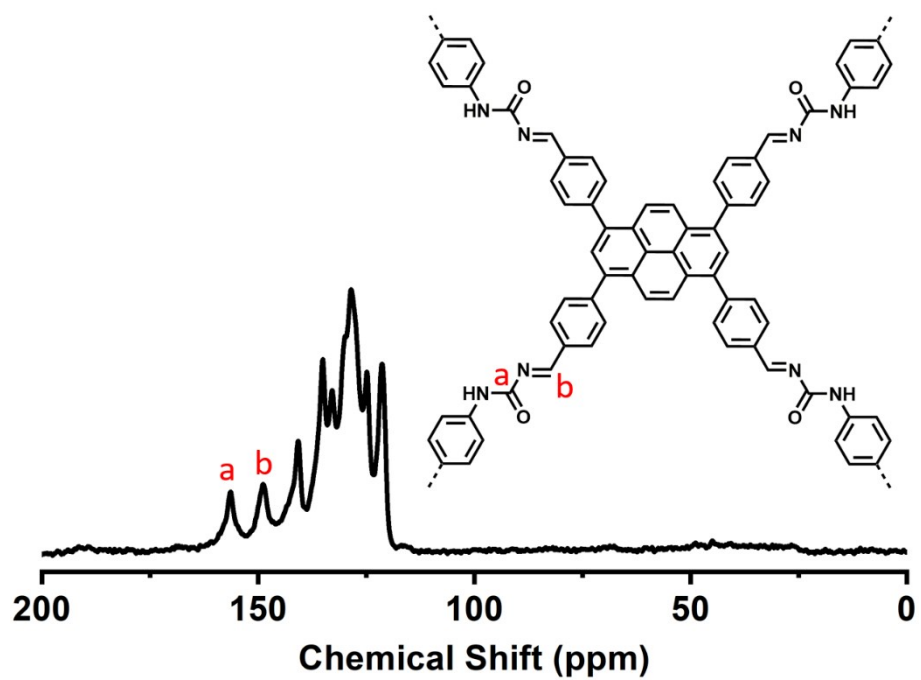

**Figure S3.** Solid-state  $^{13}\text{C}$  CP/MAS NMR spectrum of Pyurea-COF.

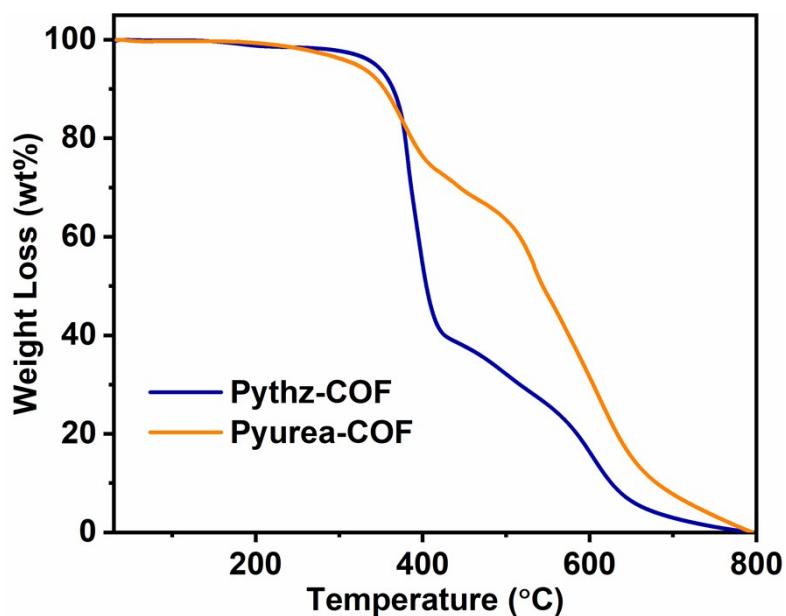

**Figure S4.** TGA profiles of Pythz-COF and Pyurea-COF.

**Table S1.** Atomic coordinates for the unit cell of Pythz-COF with AA-stacking.

| Sample Name: Pythz-COF                                                     |      |         |         |          |
|----------------------------------------------------------------------------|------|---------|---------|----------|
| Space Group: CMM2 (orthorhombic)                                           |      |         |         |          |
| $a = 38.4962, b = 42.6997, c = 3.7970; \alpha = \beta = \gamma = 90^\circ$ |      |         |         |          |
| $R_p = 5.63\%, R_{wp} = 7.78\%$                                            |      |         |         |          |
| Atom                                                                       | Type | x/a     | y/b     | z/c      |
| C1                                                                         | C    | 0.51803 | 0.44357 | 0.06609  |
| C2                                                                         | C    | 0.53696 | 0.47117 | 0.0068   |
| C3                                                                         | C    | 0.42626 | 0.47126 | -0.02667 |
| C4                                                                         | C    | 0.40379 | 0.44269 | -0.04239 |
| C5                                                                         | C    | 0.4137  | 0.41572 | -0.22985 |
| C6                                                                         | C    | 0.39225 | 0.38935 | -0.23998 |
| C7                                                                         | C    | 0.35969 | 0.38973 | -0.07536 |
| C8                                                                         | C    | 0.34882 | 0.41705 | 0.09824  |
| C9                                                                         | C    | 0.37064 | 0.44315 | 0.11534  |
| C10                                                                        | C    | 0.33748 | 0.36162 | -0.09007 |
| C11                                                                        | C    | 0.72698 | 0.72392 | 0.07244  |
| C12                                                                        | C    | 0.71423 | 0.7548  | 0.06881  |
| C13                                                                        | C    | 0.73676 | 0.78044 | 0.06496  |
| C14                                                                        | C    | 0.70193 | 0.69715 | 0.07694  |
| N15                                                                        | N    | 0.69038 | 0.64041 | 0.10206  |
| O16                                                                        | O    | 0.17094 | 0.20292 | 0.05824  |
| N17                                                                        | N    | 0.21277 | 0.16654 | 0.1129   |
| H18                                                                        | H    | 0.53058 | 0.42154 | 0.11938  |
| H19                                                                        | H    | 0.43777 | 0.41504 | -0.37476 |
| H20                                                                        | H    | 0.40085 | 0.36879 | -0.38262 |

|     |   |         |         |          |
|-----|---|---------|---------|----------|
| H21 | H | 0.32368 | 0.41816 | 0.22539  |
| H22 | H | 0.36175 | 0.46359 | 0.25822  |
| H23 | H | 0.3447  | 0.34289 | -0.26736 |
| H24 | H | 0.68655 | 0.75932 | 0.06722  |
| H25 | H | 0.72516 | 0.8034  | 0.0529   |
| H26 | H | 0.23817 | 0.1618  | 0.18969  |
| C27 | C | 0.48148 | 0.5     | 0.00127  |
| C28 | C | 0.40923 | 0.5     | -0.04677 |

**Table S2.** Atomic coordinates for the unit cell of Pyurea-COF with AA-stacking.

| Sample Name: Pyurea-COF                                                                                    |      |          |          |         |
|------------------------------------------------------------------------------------------------------------|------|----------|----------|---------|
| Space Group: P-1 (triclinic)                                                                               |      |          |          |         |
| a = b = 24.1230, c = 4.6602; $\alpha = 87.8411^\circ$ , $\beta = 92.7384^\circ$ , $\gamma = 97.5733^\circ$ |      |          |          |         |
| $R_p = 6.27\%$ , $R_{wp} = 8.16\%$                                                                         |      |          |          |         |
| Atom                                                                                                       | Type | x/a      | y/b      | z/c     |
| C1                                                                                                         | C    | -0.18069 | -0.34077 | 1.38504 |
| N2                                                                                                         | N    | -0.07696 | -0.42545 | 1.59415 |
| C3                                                                                                         | C    | -0.03869 | -0.46199 | 1.54398 |
| C4                                                                                                         | C    | -0.03969 | 0.48784  | 1.70372 |
| C5                                                                                                         | C    | 0.002    | -0.45055 | 1.33972 |
| C6                                                                                                         | C    | 0.66212  | 0.21187  | 1.47261 |
| N7                                                                                                         | N    | 0.59008  | 0.0798   | 1.34127 |
| C8                                                                                                         | C    | 0.54556  | 0.03947  | 1.4201  |
| C9                                                                                                         | C    | 0.55125  | 0.00104  | 1.6469  |
| C10                                                                                                        | C    | 0.4936   | 0.03765  | 1.27412 |
| C11                                                                                                        | C    | 0.37521  | -0.2544  | 1.55651 |
| C12                                                                                                        | C    | 0.42172  | -0.25027 | 1.75355 |
| C13                                                                                                        | C    | 0.3662   | -0.30139 | 1.3828  |
| C14                                                                                                        | C    | 0.45775  | -0.28989 | 1.77541 |
| C15                                                                                                        | C    | 0.4018   | -0.34147 | 1.39782 |
| C16                                                                                                        | C    | 0.44967  | -0.33743 | 1.59591 |
| C17                                                                                                        | C    | 0.48887  | -0.37628 | 1.59943 |
| C18                                                                                                        | C    | 0.47161  | -0.43524 | 1.59137 |
| C19                                                                                                        | C    | 0.54628  | -0.35708 | 1.59058 |
| C20                                                                                                        | C    | 0.50931  | -0.47183 | 1.52012 |
| C21                                                                                                        | C    | 0.41623  | -0.458   | 1.65131 |
| C22                                                                                                        | C    | 0.58597  | -0.39318 | 1.54449 |
| C23                                                                                                        | C    | 0.56591  | -0.45073 | 1.48768 |
| C24                                                                                                        | C    | 0.39792  | -0.51328 | 1.61097 |
| C25                                                                                                        | C    | 0.64334  | -0.37272 | 1.54032 |
| C26                                                                                                        | C    | 0.68368  | -0.3983  | 1.71918 |
| C27                                                                                                        | C    | 0.66541  | -0.33108 | 1.3313  |
| C28                                                                                                        | C    | 0.73984  | -0.38749 | 1.67148 |

|     |   |          |          |         |
|-----|---|----------|----------|---------|
| C29 | C | 0.72195  | -0.32128 | 1.28924 |
| C30 | C | 0.76064  | -0.3498  | 1.45181 |
| O31 | O | -0.09595 | -0.39191 | 1.13678 |
| O32 | O | 0.60299  | 0.12223  | 1.77609 |
| N33 | N | -0.14643 | -0.37065 | 1.5219  |
| C34 | C | -0.1046  | -0.39513 | 1.3923  |
| N35 | N | 0.64469  | 0.16374  | 1.36449 |
| C36 | C | 0.61238  | 0.12145  | 1.52178 |
| H37 | H | -0.16452 | -0.30807 | 1.21553 |
| H38 | H | -0.0879  | -0.41845 | 1.81742 |
| H39 | H | -0.07198 | 0.47673  | 1.87442 |
| H40 | H | 0.00471  | -0.40994 | 1.20482 |
| H41 | H | 0.70531  | 0.21949  | 1.58531 |
| H42 | H | 0.60827  | 0.07858  | 1.12761 |
| H43 | H | 0.59321  | 0.00112  | 1.77038 |
| H44 | H | 0.48746  | 0.06828  | 1.08656 |
| H45 | H | 0.43029  | -0.21316 | 1.90089 |
| H46 | H | 0.32855  | -0.30696 | 1.2243  |
| H47 | H | 0.49474  | -0.28522 | 1.93817 |
| H48 | H | 0.39368  | -0.37879 | 1.25172 |
| H49 | H | 0.56197  | -0.31092 | 1.62128 |
| H50 | H | 0.38624  | -0.43014 | 1.7344  |
| H51 | H | 0.35291  | -0.53093 | 1.65704 |
| H52 | H | 0.66923  | -0.42813 | 1.90433 |
| H53 | H | 0.63593  | -0.30589 | 1.19889 |
| H54 | H | 0.77105  | -0.40925 | 1.8115  |
| H55 | H | 0.73878  | -0.2892  | 1.11833 |

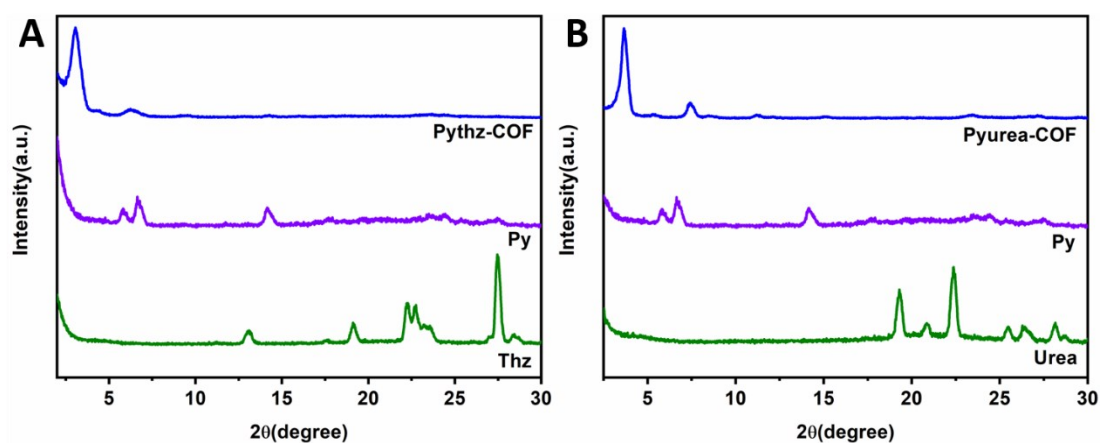

**Figure S5.** A) PXRD patterns of Pythz-COF, Py and Thz. B) PXRD patterns of Pyurea-COF, Py and Urea.

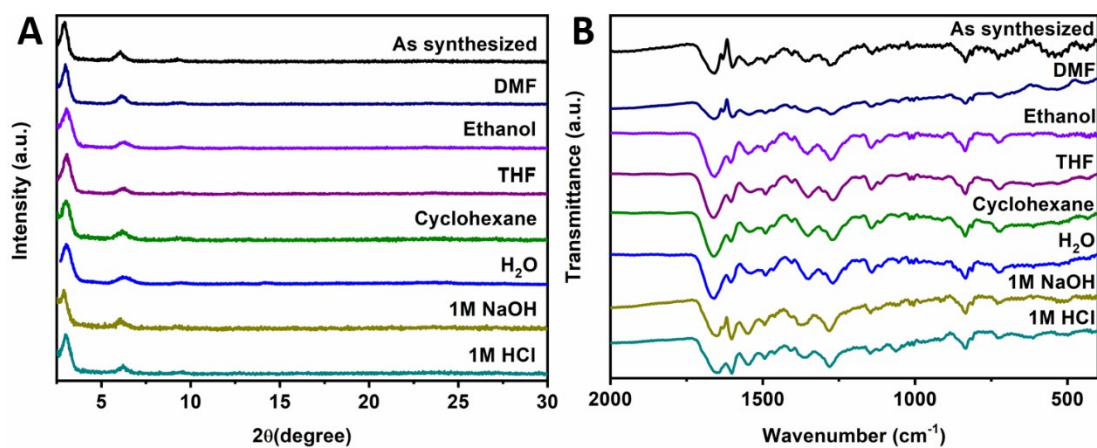

**Figure S6.** A) XRD patterns and B) FT-IR spectra of Pythz-COF upon treatment in different solvents.

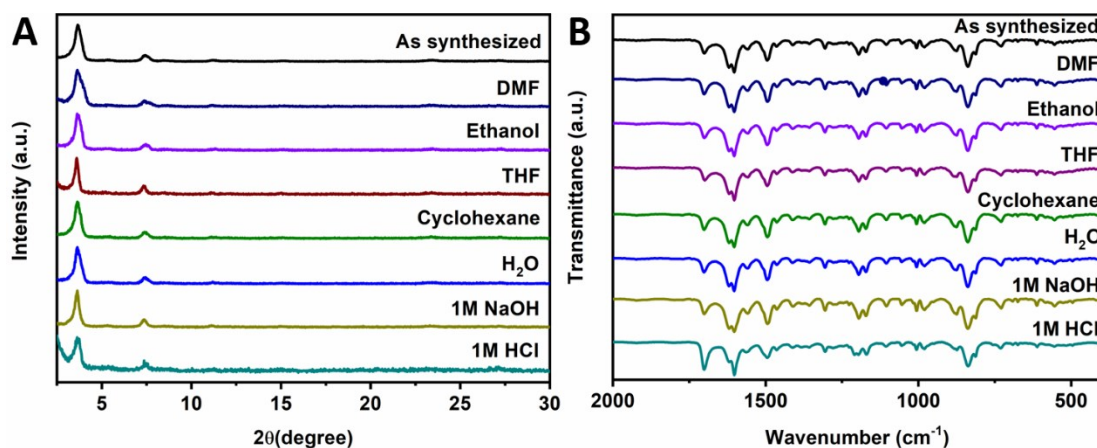

**Figure S7.** A) XRD patterns and B) FT-IR spectra of Pyurea-COF upon treatment in different solvents.

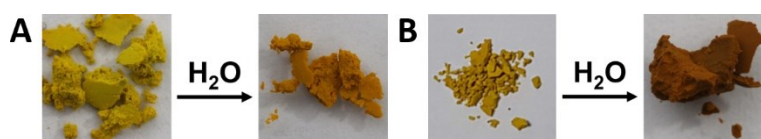

**Figure S8.** A) Photographs of the dry and wet Pythz-COF. B) Photographs of the dry and wet Pyurea-COF.

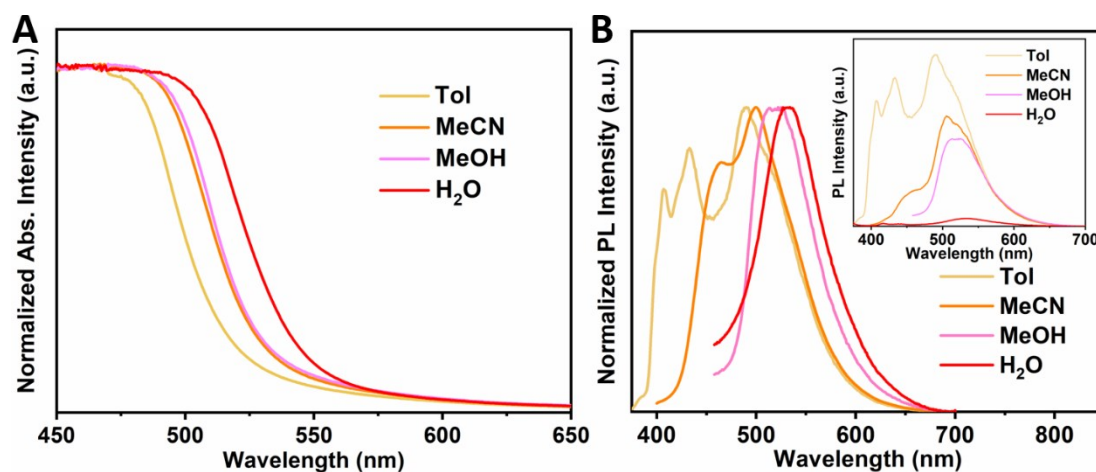

**Figure S9.** A) Solid-state UV-Vis absorption spectra of Pythz-COF soaked by various polarity solvents. B) PL spectra of Pythz-COF in various polarity solvents (0.1mg/ml).

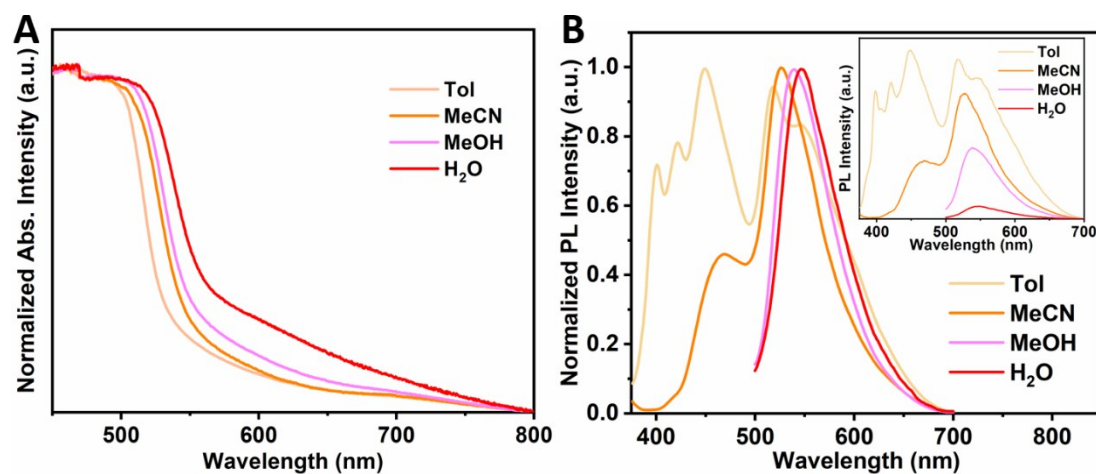

**Figure S10.** A) Solid-state UV-Vis absorption spectra of Pyurea-COF soaked by various polarity solvents. B) PL spectra of Pyurea-COF in various polarity solvents (0.1mg/ml).



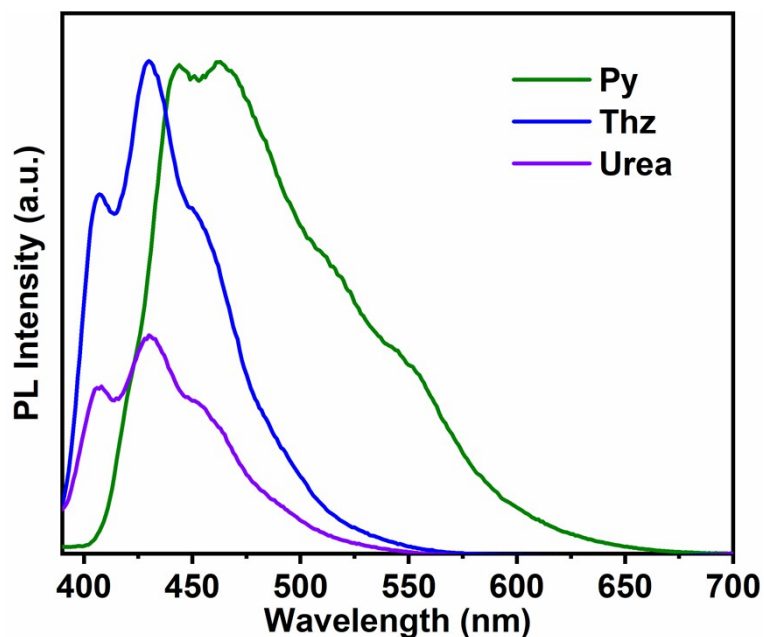

**Figure S11.** The PL spectra of the monomers (Py, Thz and Urea) in acetonitrile ( $10^{-5}$  mol/L).

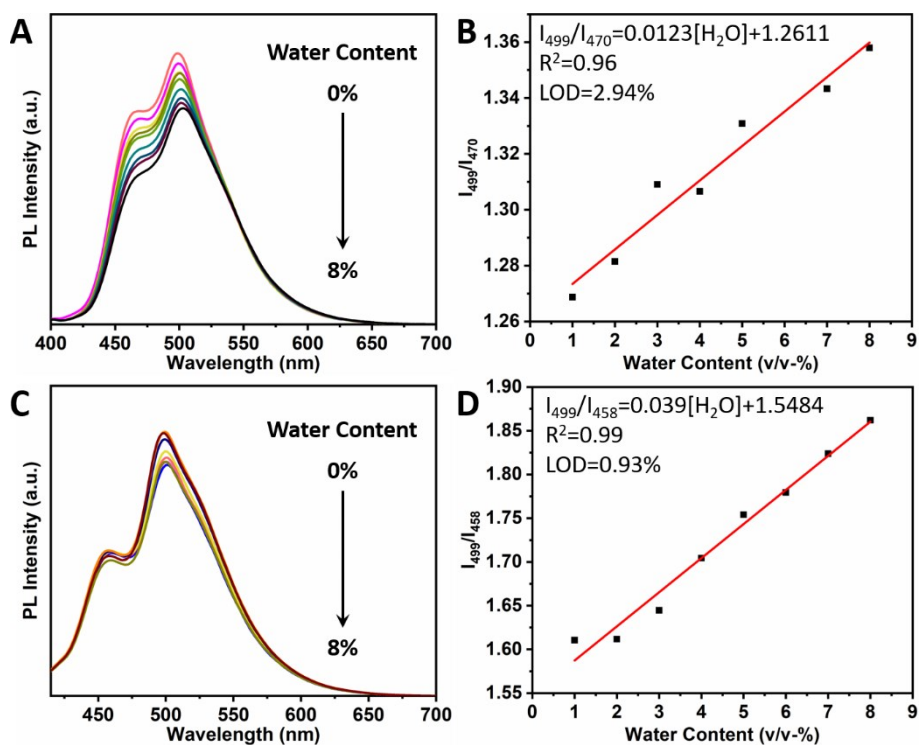

**Figure S12.** A) PL spectra of Pythz-COF in *N,N*-Dimethylformamide with trace content of water. B) The linear correlation between the fluorescence of Pythz-COF and different water contents in *N,N*-Dimethylformamide. C) PL spectra of Pythz-COF in tetrahydrofuran with trace content of water. D) The linear correlation between the fluorescence of Pythz-COF and different water contents in tetrahydrofuran.

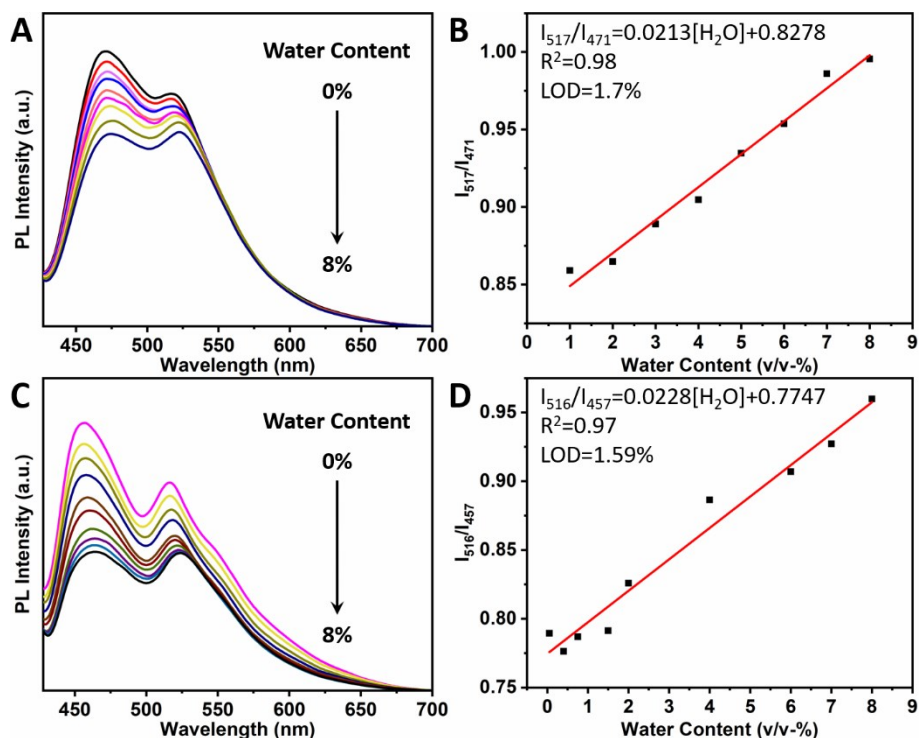

**Figure S13.** A) PL spectra of Pyurea-COF in N,N-Dimethylformamide with trace content of water. B) The linear correlation between the fluorescence of Pyurea-COF and different water contents in N,N-Dimethylformamide. C) PL spectra of Pyurea-COF in tetrahydrofuran with trace content of water. D) The linear correlation between the fluorescence of Pyurea-COF and different water contents in tetrahydrofuran.

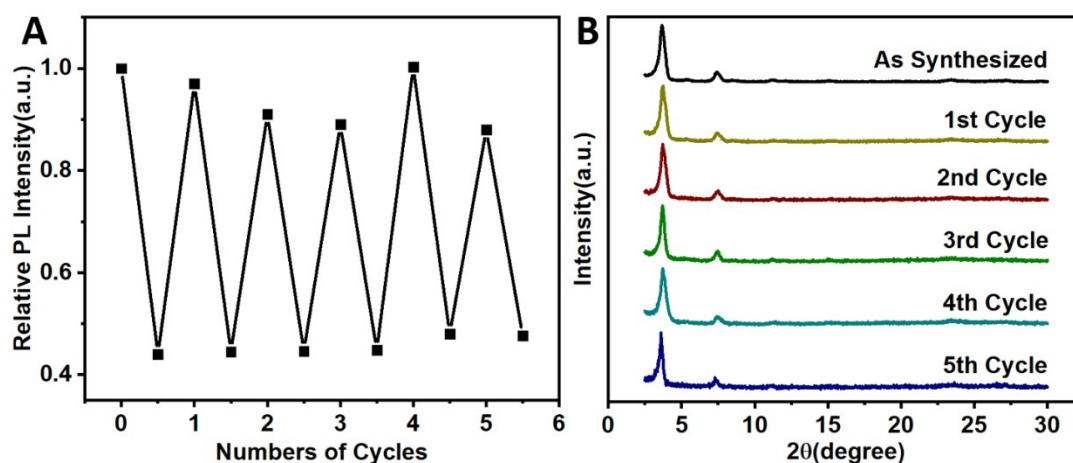

**Figure S14.** A) Reversible switching of relative PL intensity of Pyurea-COF with or without being added water (7%), em: 527nm. B) PXR patterns of Pyurea-COF after different cycles of trace water sensing (7%).

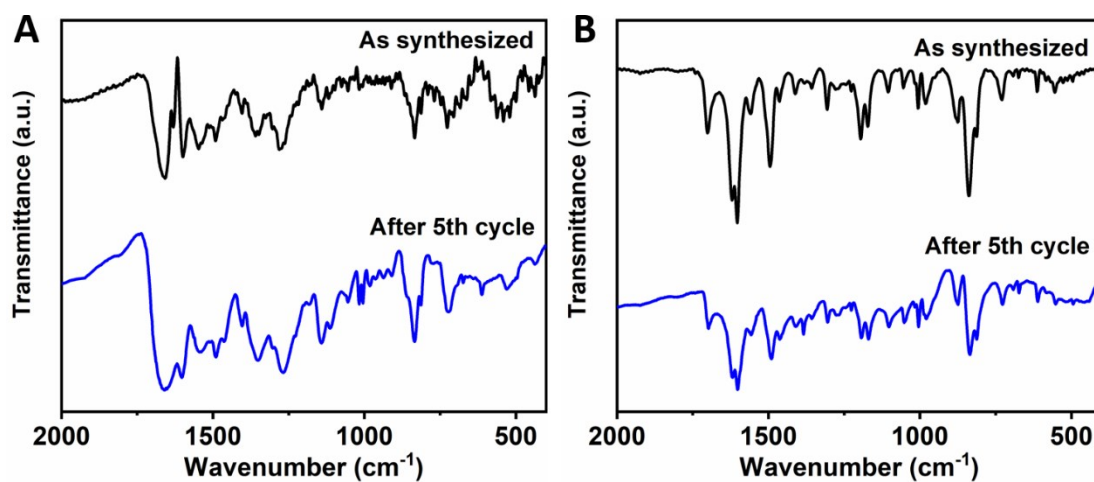

**Figure S15.** FTIR spectra of A) Pythz-COF and B) Pyurea-COF before and after 5 cycles of trace water sensing.

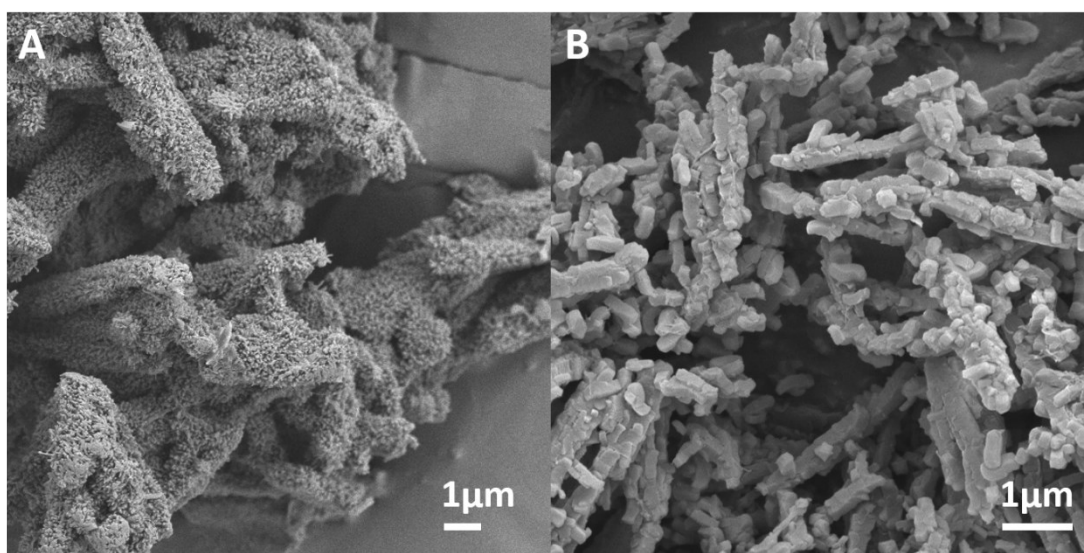

**Figure S16.** SEM images of A) Pythz-COF and B) Pyurea-COF after 5 cycles of trace water sensing.

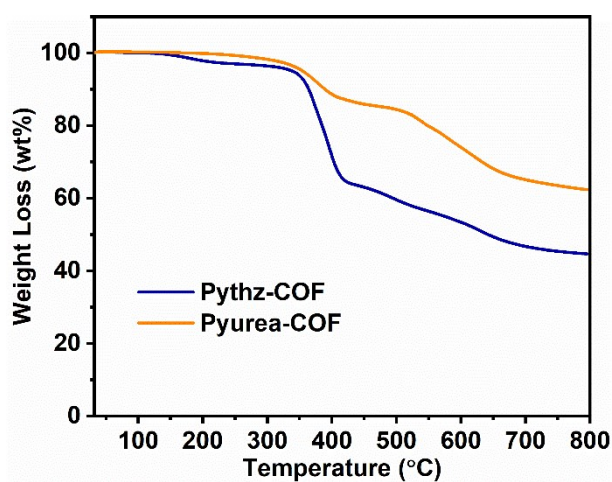

**Figure S17.** TGA profiles of Pythz-COF and Pyurea-COF after 5 cycles of trace water sensing.

**Table S3.** Comparison of the sensing performance of various materials toward water.

| Materials                                  | Type             | Solvents     | LOD            | Ref.      |
|--------------------------------------------|------------------|--------------|----------------|-----------|
| Pythz-COF                                  | COF              | acetonitrile | 0.09 (v/v-%)   | This work |
| Pyurea-COF                                 |                  |              | 0.02 (v/v-%)   |           |
| COFs                                       | COF              | methanol     | 0.042 (v/v-%)  | 1         |
| TzDa                                       | COF              | EtAC         | 0.006 (wt-%)   | 2         |
| COF-4-OH                                   | COF              | ethanol      | 0.03 (v/v-%)   | 3         |
| TAPT-BMTA-COF                              | COF              | acetonitrile | 0.12 (v/v-%)   | 4         |
| Tb <sub>97.11</sub> Eu <sub>2.89</sub> -L1 | MOF              | acetonitrile | 0.04 (v/v-%)   | 5         |
| AEMOF-1'                                   | MOF              | THF          | 0.05 (v/v-%)   | 6         |
| PPQ-CDs                                    | carbon dots      | DMSO         | 0.023 (v/v-%)  | 7         |
| RCDs                                       | carbon dots      | acetone      | 0.082% (v/v-%) | 8         |
| MOF@superparamagnetic                      | complex material | hexane       | 0.3 (wt-%)     | 9         |

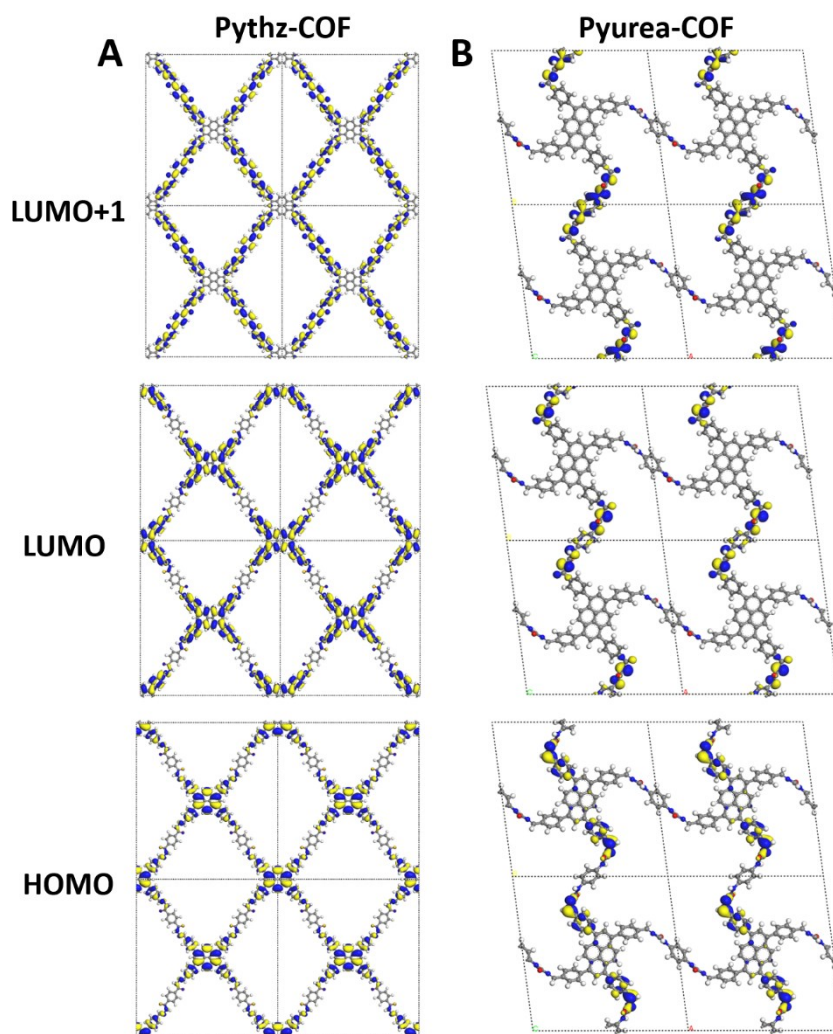



**Figure S18.** The frontier orbital contribution of the single-layer molecular structure of A) Pythz-COF and B) Pyurea-COF by DFT calculations.

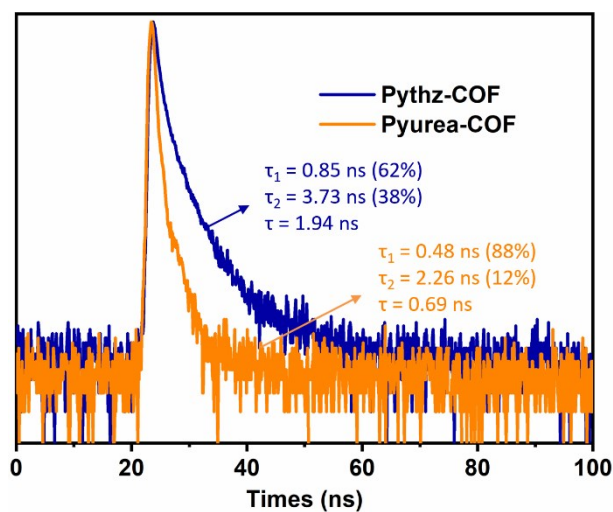

**Figure S19.** Fluorescence decay profiles of two COFs in solid state.

**Table S4.** Summary of textural properties of various materials along with their water uptake performance.

| Materials                | Type | BET surface area (m <sup>2</sup> /g) | Total pore volume (cm <sup>3</sup> /g) | H <sub>2</sub> O adsorption (mmol/g) <sup>b</sup> | H <sub>2</sub> O adsorption (wt%) <sup>b</sup> | Temperature (K) | Ref.      |
|--------------------------|------|--------------------------------------|----------------------------------------|---------------------------------------------------|------------------------------------------------|-----------------|-----------|
| Pythz-COF                | COF  | 1571                                 | 1.01                                   | 46.2                                              | 83.2                                           | 298             | This work |
| Pyurea-COF               |      | 1016                                 | 0.53                                   | 35.8                                              | 64.5                                           |                 |           |
| COF-432                  | COF  | 895                                  | 0.43                                   | 16.7                                              | 30                                             | 298             | 10        |
| AB-COF                   | COF  | 1125                                 | 0.47                                   | 22.9                                              | 41                                             | 288             | 11        |
| ATFG-COF                 |      | 520                                  | 0.5                                    | 13.6                                              | 25                                             |                 |           |
| DhaTab                   | COF  | N/A <sup>a</sup>                     | N/A                                    | 31.7                                              | 57                                             | 298             | 12        |
| TpPa-1                   | COF  | 1432                                 | N/A                                    | 28.9                                              | 52                                             | 298             | 13        |
| TpAzo                    |      | 3038                                 |                                        | 22.7                                              | 41                                             |                 |           |
| Trzn-COF                 | COF  | 408.5                                | N/A                                    | 2                                                 | 4                                              | 298             | 14        |
| 2D ep-POP                | POP  | 852                                  | 0.18                                   | 22.9                                              | 41.1                                           | 298             | 15        |
| 3D ep-POP                |      | 779                                  | 0.17                                   | 22.9                                              | 41.1                                           |                 |           |
| KFUPM-1                  | POP  | 305                                  | N/A                                    | 18.7                                              | 33.5                                           | 298             | 16        |
| UiO-66                   | MOF  | 1160                                 | 0.52                                   | 20.5                                              | 37                                             | 298             | 17        |
| UiO-66-NH <sub>2</sub>   |      | 1040                                 | 0.57                                   | 20.5                                              | 37                                             |                 |           |
| UiO-67                   | MOF  | 2064                                 | 0.97                                   | 10                                                | 18                                             | 293             | 18        |
| H <sub>2</sub> N-MIL-125 |      | 1220                                 | 0.55                                   | 20.5                                              | 37                                             |                 |           |

<sup>a</sup> N/A: Not available

<sup>b</sup> Condensation effects observed at higher humidity levels.

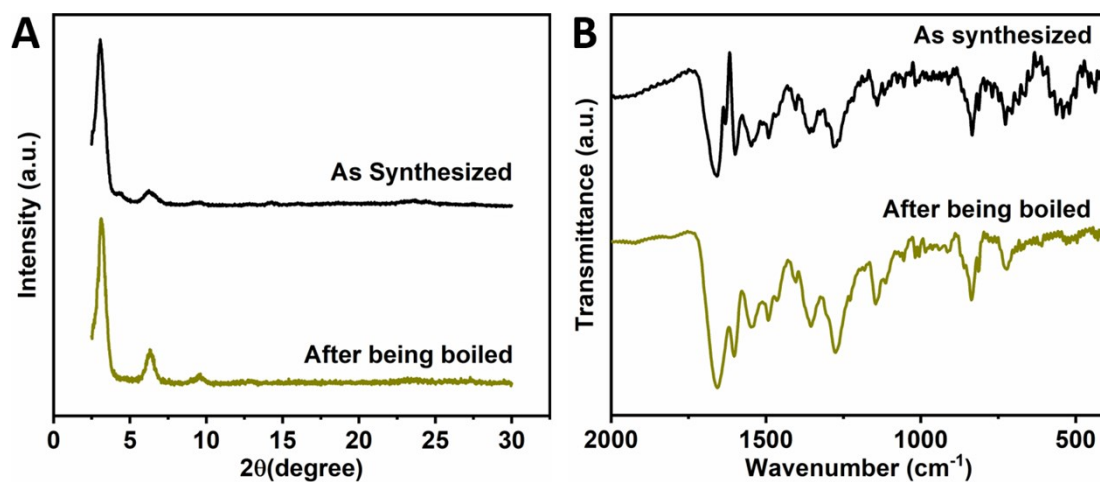

**Figure S20.** A) PXRD patterns and B) FTIR spectra of Pythz-COF before and after being boiled in hot water (80 °C) for 8 hours.

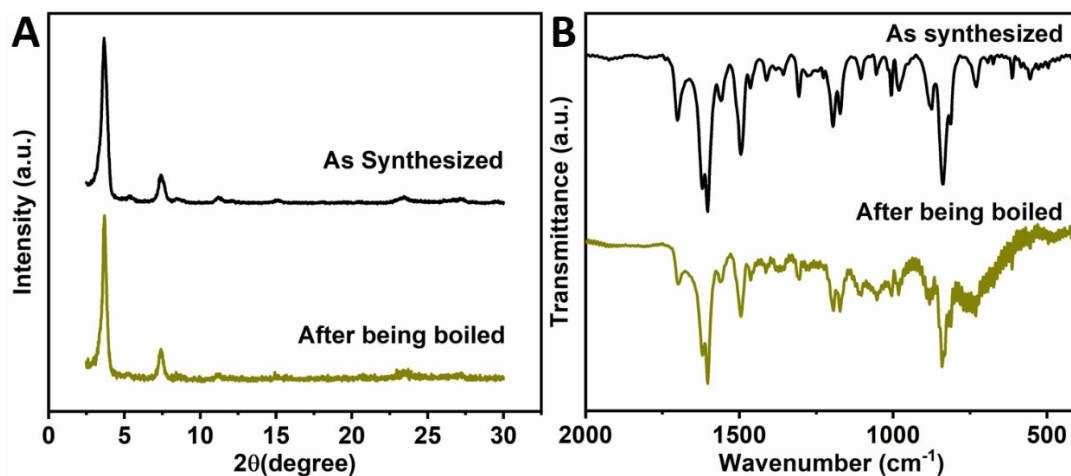

**Figure S21.** A) PXRD patterns and B) FTIR spectra of Pyurea-COF before and after being boiled in hot water (80 °C) for 8 hours.

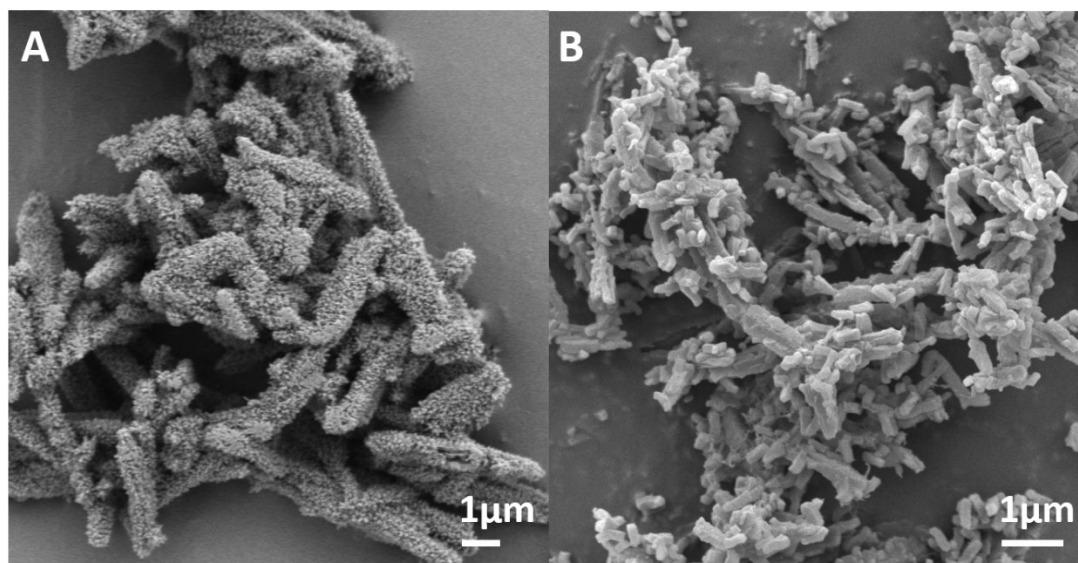

**Figure S22.** SEM images of A) Pythz-COF and B) Pyurea-COF after being boiled in hot water (80 °C) for 8 hours.

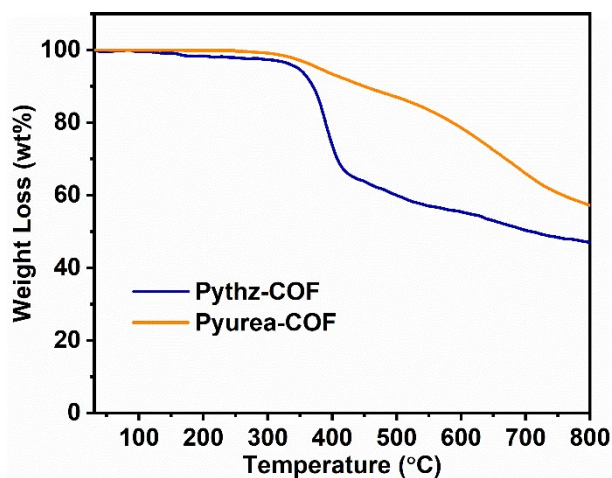

**Figure S23.** TGA profiles of Pythz-COF and Pyurea-COF after being boiled in hot water (80 °C) for 8 hours.

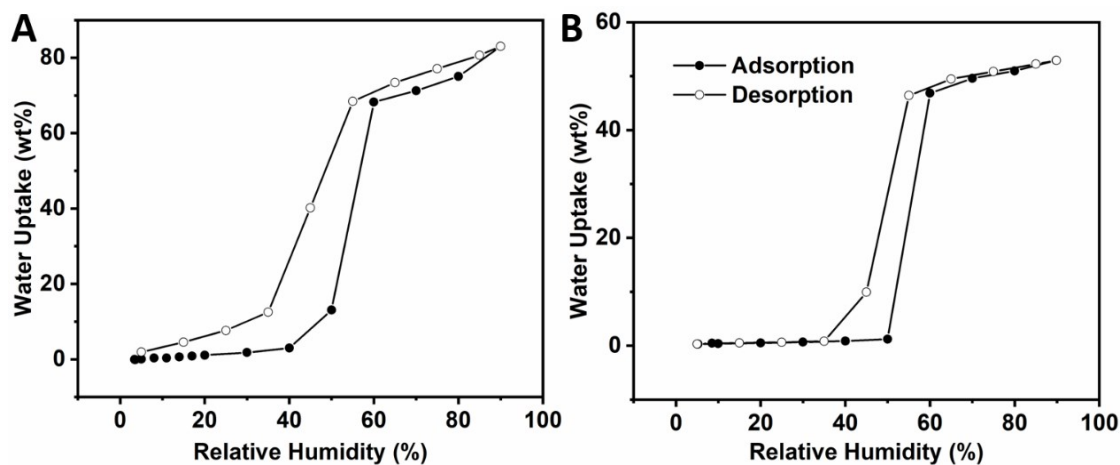

**Figure S24.** Water sorption analysis on A) Pythz-COF and B) Pyurea-COF after being boiled in hot water (80 °C) for 8 hours in the relative humidity range between 0% and 90% measured at 298K.

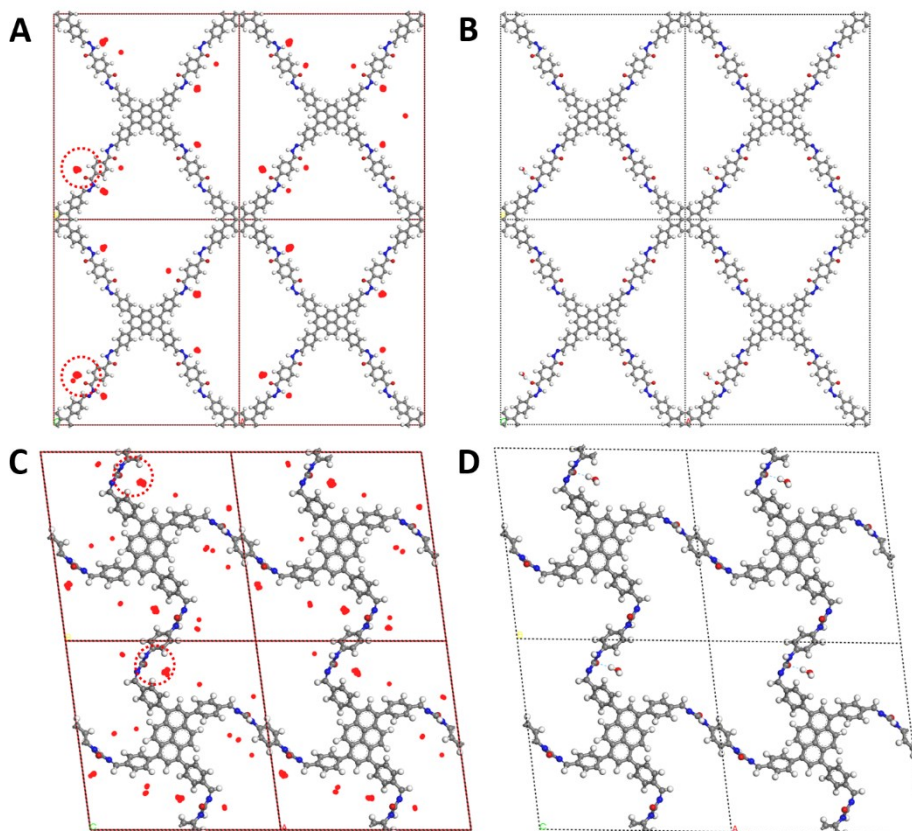

**Figure S25.** Simulated adsorption location of H<sub>2</sub>O in A) Pythz-COF and C) Pyurea-COF and H<sub>2</sub>O is most likely to occur in the red circle (The area of red dots is proportional to the probability of H<sub>2</sub>O occurrence); Theoretical calculation on hydrogen bonds between B) Pythz-COF and D) Pyurea-COF (grey: C, blue: N, white: H, red: O).

### 3. Reference

- 1) Y. Chen, C. Zhang, J. Xie, H. Li, W. Dai, Q. Deng and S. Wang, *Anal Chim Acta*, 2020, **1109**, 114-121.
- 2) H. L. Qian, C. Dai, C. X. Yang and X. P. Yan, *ACS Appl Mater Inter*, 2017, **9**, 24999-25005.
- 3) H. Q. Yin, F. Yin and X. B. Yin, *Chem Sci*, 2019, **10**, 11103-11109.
- 4) W. Ma, S. Jiang, W. Zhang, B. Xu and W. Tian, *Macromol Rapid Commun*, 2020, e2000003.
- 5) B. Li, W. Wang, Z. Hong, E. M. El-Sayed and D. Yuan, *Chem Commun*, 2019, **55**, 6926-6929.
- 6) A. Douvali, A. C. Tsipis, S. V. Eliseeva, S. Petoud, G. S. Papaefstathiou, C. D. Malliakas, I. Papadas, G. S. Armatas, I. Margiolaki, M. G. Kanatzidis, T. Lazarides and M. J. Manos, *Angew Chem Int Ed*, 2015, **54**, 1651-1656.
- 7) S. Pawar, U. K. Togiti, A. Bhattacharya and A. Nag, *ACS Omega*, 2019, **4**, 11301-11311.
- 8) J. Wang, J. Wang, W. Xiao, Z. Geng, D. Tan, L. Wei, J. Li, L. Xue, X. Wang and J. Zhu, *Anal Methods*, 2020, **12**, 3218-3224.
- 9) T. Wehner, M. T. Seuffert, J. R. Sorg, M. Schneider, K. Mandel, G. Sextl and K.



- Müller-Buschbaum, *J Mater Chem C*, 2017, **5**, 10133-10142.
- 10) H. L. Nguyen, N. Hanikel, S. J. Lyle, C. Zhu, D. M. Proserpio and O. M. Yaghi, *J Am Chem Soc*, 2020, **142**, 2218-2221.
- 11) L. Stegbauer, M. W. Hahn, A. Jentys, G. Savasci, C. Ochsenfeld, J. A. Lercher and B. V. Lotsch, *Chem Mater*, 2015, **27**, 7874-7881.
- 12) B. P. Biswal, S. Kandambeth, S. Chandra, D. B. Shinde, S. Bera, S. Karak, B. Garai, U. K. Kharul and R. Banerjee, *J Mater Chem A*, 2015, **3**, 23664-23669.
- 13) S. Karak, S. Kandambeth, B. P. Biswal, H. S. Sasmal, S. Kumar, P. Pachfule and R. Banerjee, *J Am Chem Soc*, 2017, **139**, 1856-1862.
- 14) D. Mullangi, S. Nandi, S. Shalini, S. Sreedhala, C. P. Vinod and R. Vaidhyanathan, *Sci Rep*, 2015, **5**, 10876.
- 15) Y. Byun and A. Coskun, *Angew Chem Int Ed Engl*, 2018, **57**, 3173-3177.
- 16) Mahmoud M. Abdelnaby, A. M. Alloush, N. A. A. Qasem, B. A. Al-Maythalony, R. B. Mansour, K. E. Cordova and O. C. S. Al Hamouz, *J Mater Chem A*, 2018, **6**, 6455-6462.
- 17) P. M. Schoenecker, C. G. Carson, H. Jasuja, C. J. J. Flemming and K. S. Walton, *Ind Eng Chem Res*, 2012, **51**, 6513-6519.
- 18) F. Jeremias, V. Lozan, S. K. Henninger and C. Janiak, *Dalton Trans*, 2013, **42**, 15967-15973.
